# Supplementary material for: Long Noncoding RNA Lnc-TLN2-4:1 Suppresses Gastric Cancer Metastasis and Is Associated with Patient Survival
Source: Hindawi journal article supplement (doi:10.1155/2020/8681361), 2020-03-11
Supplement: f1 [file 8681361.f1.pdf]

## SUPPLEMENTARY FIGURE LEGENDS

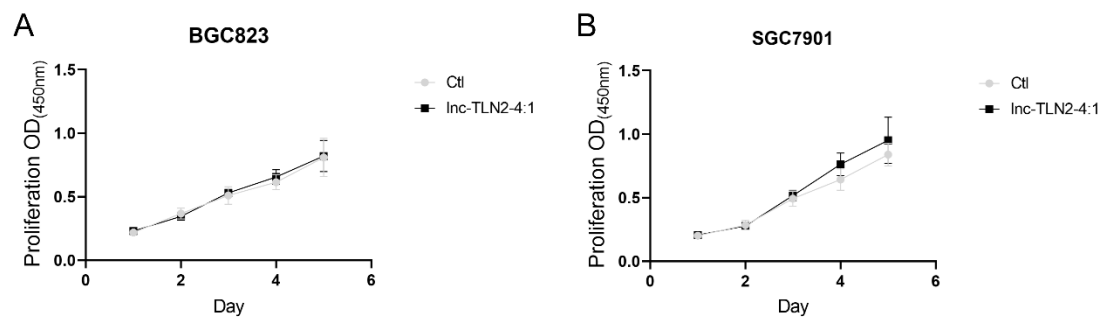

**Figure S1. Inc-TLN2-4:1 doses not affect the abilities of BGC823 and SGC7901 cells to proliferate. (A and B)** the proliferative abilities of BGC823 and SGC7901 cells which were transfected with control or Inc-TLN2-4:1-overexpressing vectors were analyzed using a CCK8 kit.
